# Supplementary material for: Glycoside Hydrolases and Non-Enzymatic Glycation Inhibitory Potential of Viburnum opulus L. Fruit—In Vitro Studies
Source: MDPI journal article supplement (doi:10.3390/antiox10060989), 2021-06-21
Supplement: s1 [file s1]

# Glycoside Hydrolases and Non-Enzymatic Glycation Inhibitory Potential of *Viburnum opulus* L. Fruit—In Vitro Studies

Dominika Kajszczak <sup>1,\*</sup>, Agnieszka Kowalska-Baron <sup>2</sup> and Anna Podsędek <sup>1</sup>

<sup>1</sup> Institute of Molecular and Industrial Biotechnology, Faculty of Biotechnology and Food Sciences, Lodz University of Technology, Stefanowskiego 2/22, 90-537 Łódź, Poland; anna.podsedek@p.lodz.pl

<sup>2</sup> Institute of Natural Products and Cosmetics, Faculty of Biotechnology and Food Sciences, Lodz University of Technology, Stefanowskiego 2/22, 90-537 Łódź, Poland; agnieszka.kowalska-baron@p.lodz.pl;

\* Correspondence: dominika.kajszczak@dokt.p.lodz.pl

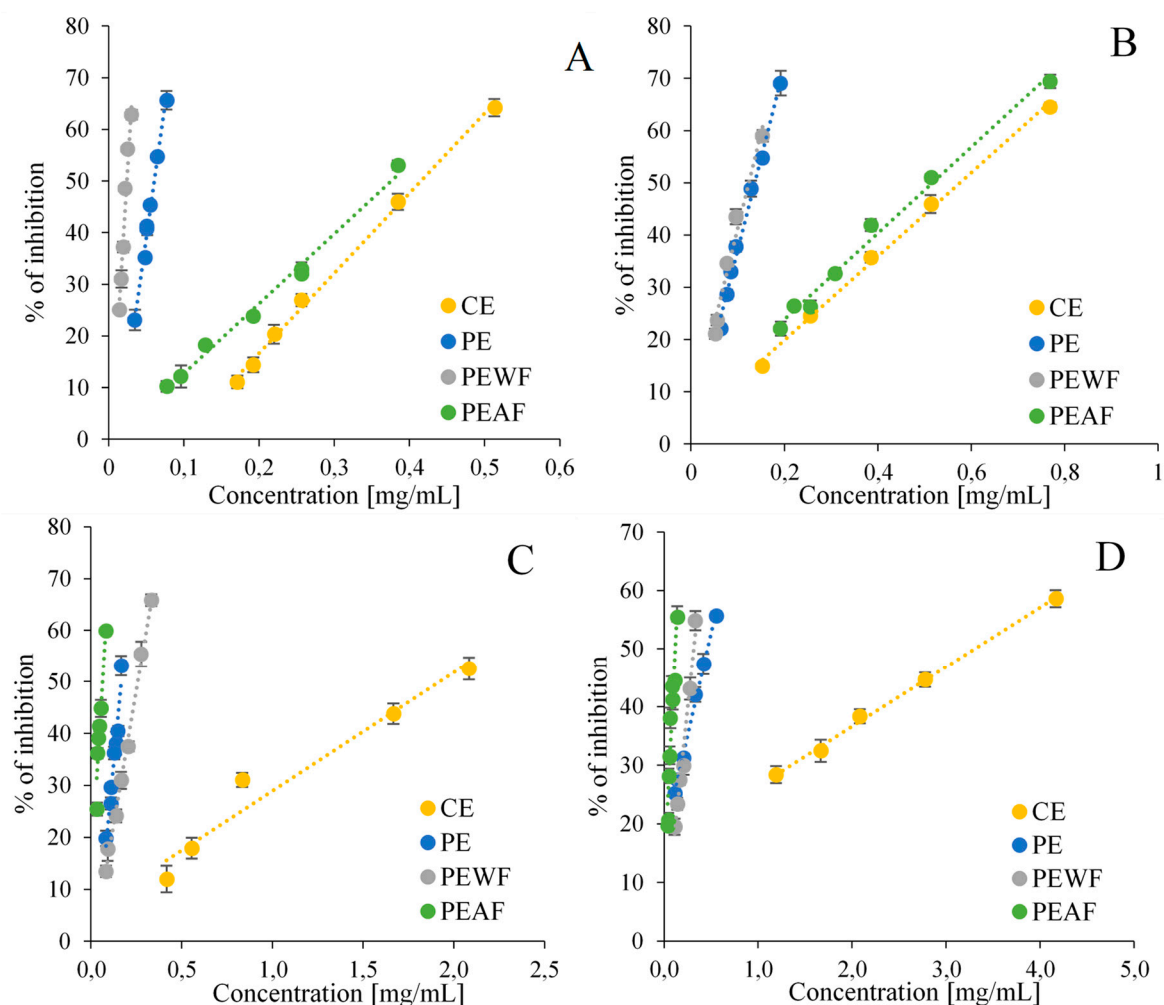

**Figure S1.** Inhibitory effects of *V. opulus* fruit samples on  $\alpha$ -amylase activity in the presence of potato starch (A) and starch from rice (B), and on  $\alpha$ -glucosidase activity in the presence of maltose (C) and sucrose (D). CE—crude extract, PE—purified extract, PEAf—ethyl acetate fraction of PE, PEWF—water fraction of PE.

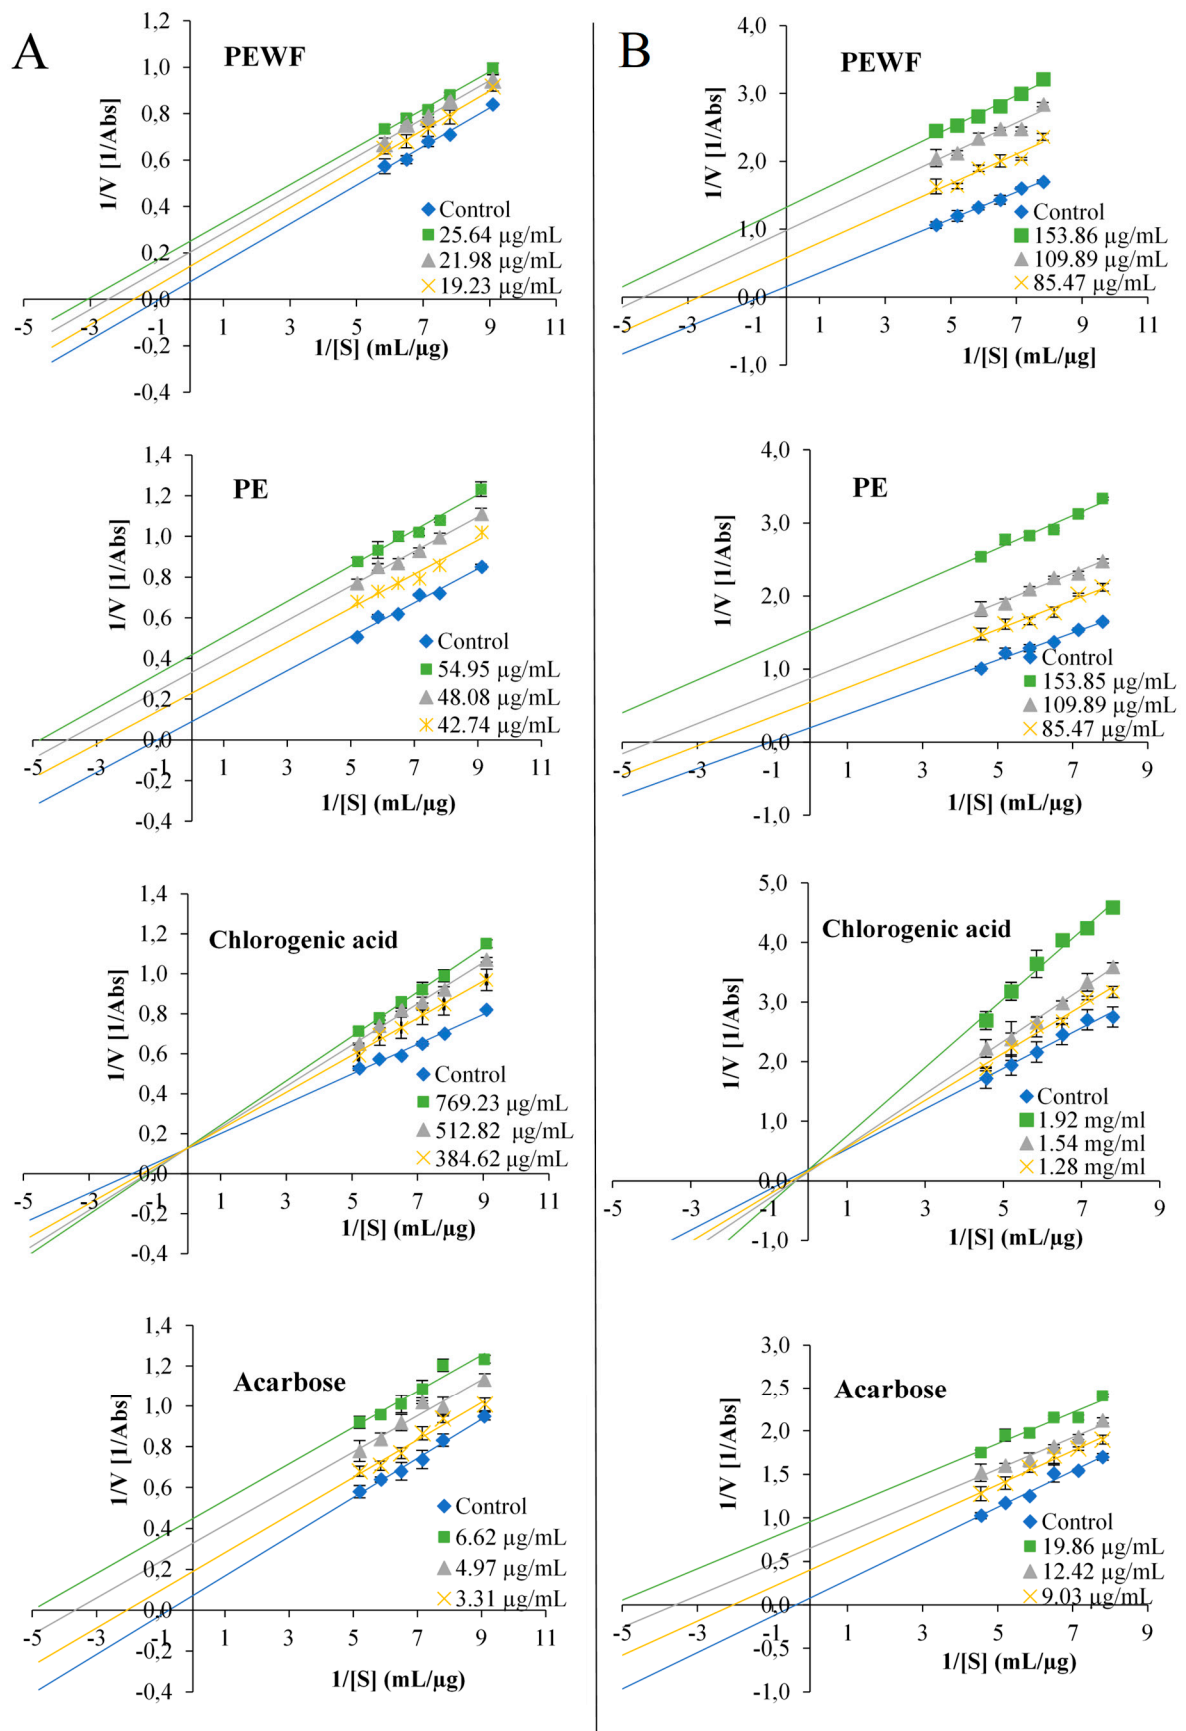

**Figure S2.** Inhibition mode of the *V. opulus* fruit samples (PE and PEWF) and reference substance (chlorogenic acid and acarbose) on  $\alpha$ -amylase in the presence of potato starch (A) and starch from rice (B).

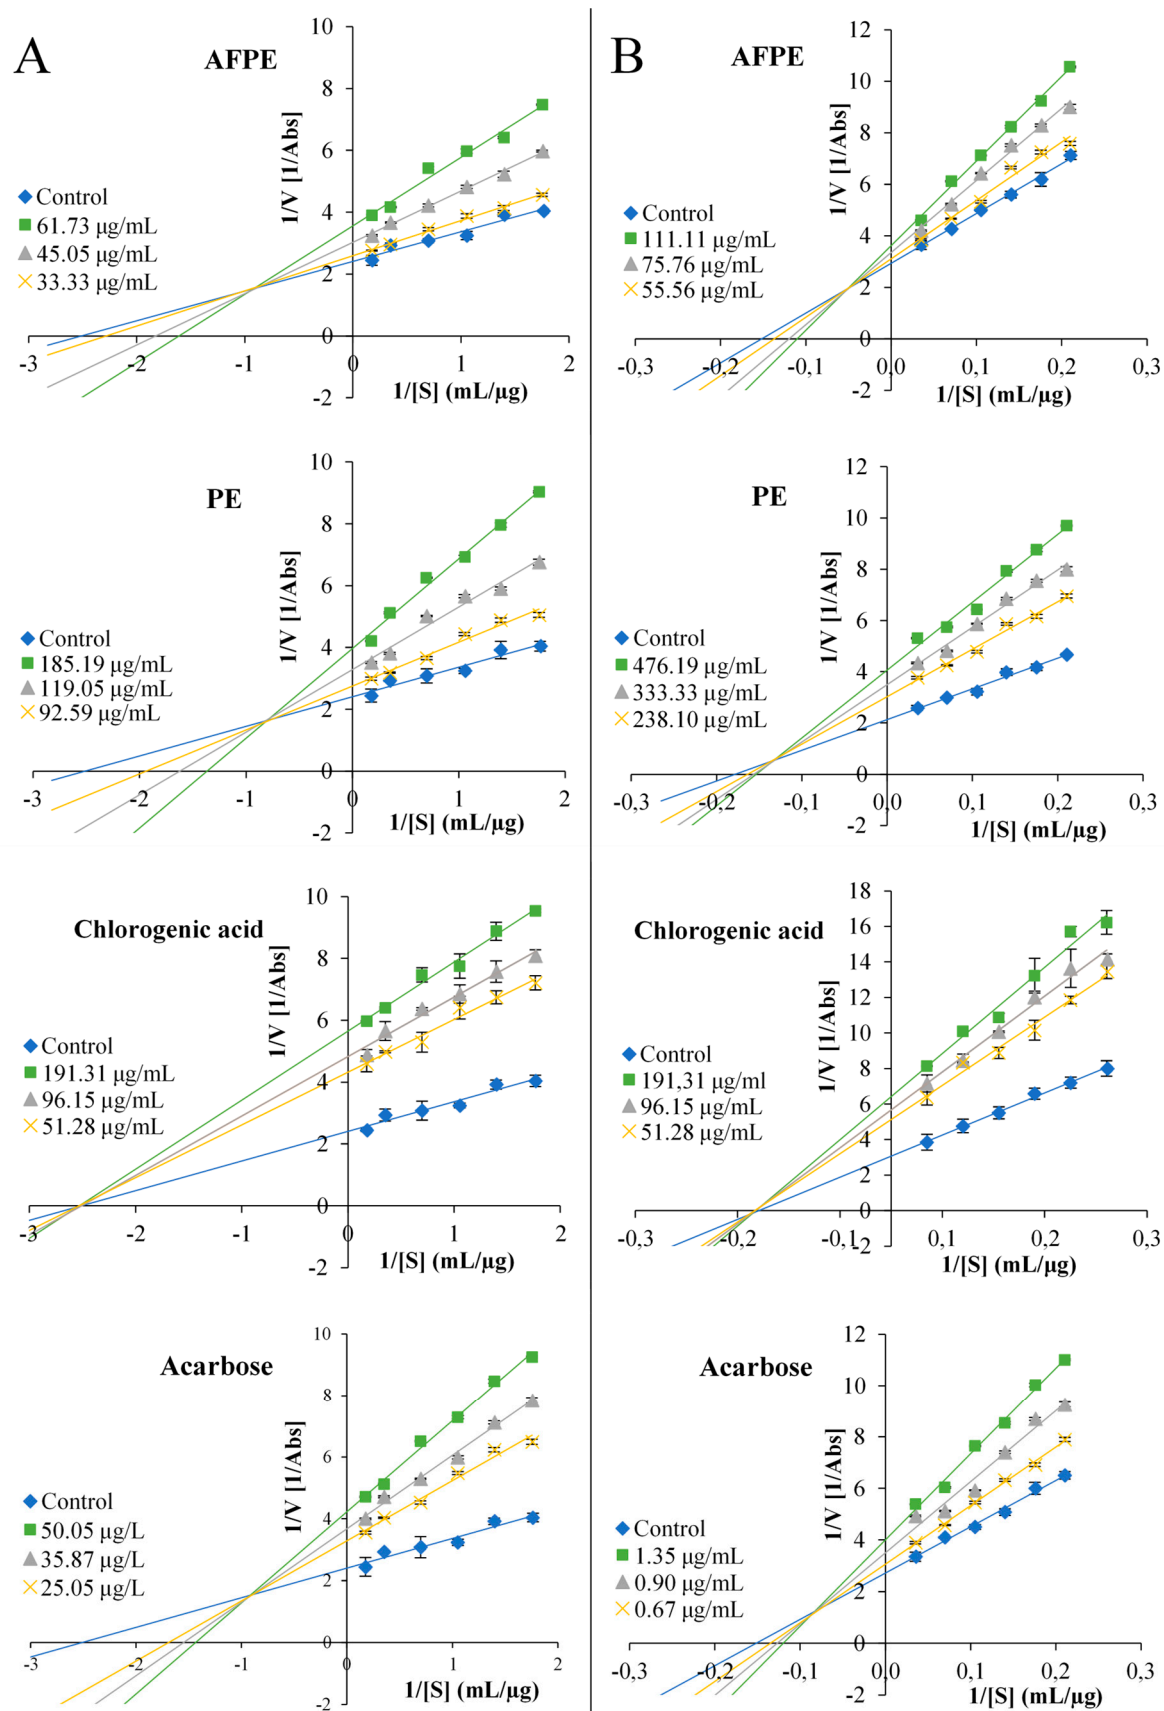

**Figure S3.** Inhibition mode of the *V. opulus* fruit samples (PE and PFAF) and reference substance (chlorogenic acid and acarbose) on  $\alpha$ -glucosidase in the presence of maltose (A) and sucrose (B).

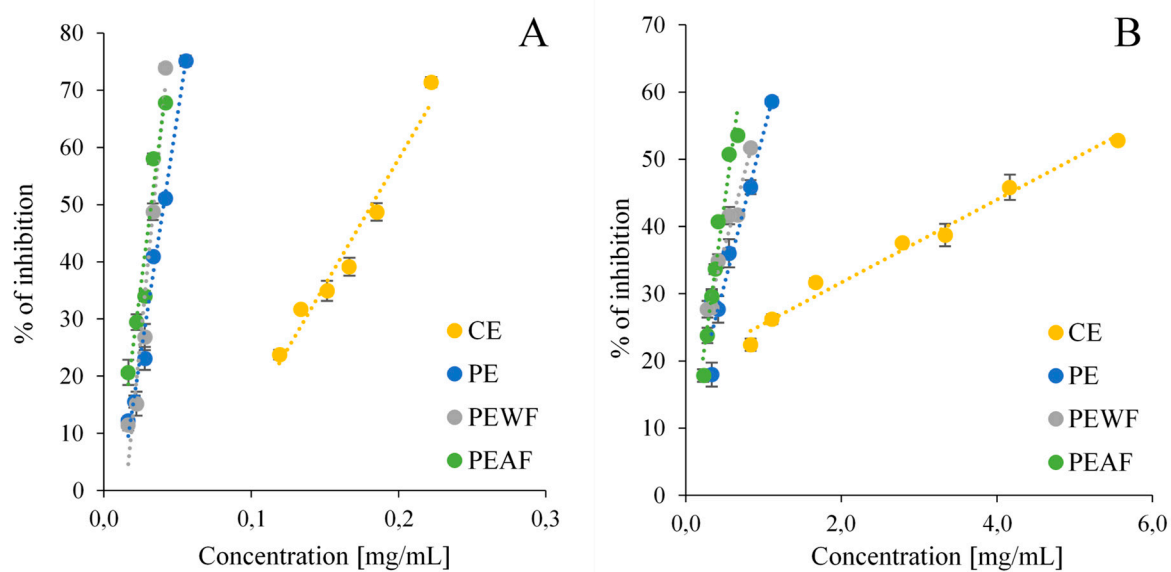

**Figure S4.** The inhibitory effects of *V. opulus* fruit samples on advanced glycation-end products (AGE) formation in BSA-fructose (A) and BSA-glucose (B) models. CE—crude extract, PE—purified extract, PEAf—ethyl acetate fraction of PE, PEWF—water fraction of PE.
